# Supplementary material for: Predicting Survival Duration With MRI Radiomics of Brain Metastases From Non-small Cell Lung Cancer
Source: PubMed Central journal article supplement (PMC7973105; doi:10.3389/fonc.2021.621088), 2021-03-05
Supplement: Table_1.pdf [file Table_1.pdf]

## Supplementary Material

Table 1S. Top 20 features for predicting whether patients survive longer than the group median in EGFR, ALK, and KRAS mutation-positive groups.

| Mutation | Region     | Feature type      | Filter #          | Feature group##                      | Feature Name                        |
|----------|------------|-------------------|-------------------|--------------------------------------|-------------------------------------|
| EGFR     | Edema      | Intensity         | squareroot        | Intensity                            | Median*                             |
|          |            |                   | logarithm         | Intensity                            | Kurtosis                            |
|          |            | Texture           | original          | GLCM                                 | ClusterShade                        |
|          |            |                   | logarithm         | GLSZM                                | GrayLevelNonUniformity              |
|          |            |                   | logarithm         | NGTDM                                | Contrast                            |
|          |            |                   | original          | GLDM                                 | LargeDependenceLowGrayLevelEmphasis |
|          |            |                   | logarithm         | GLRLM                                | LongRunLowGrayLevelEmphasis         |
|          |            |                   | square            | GLDM                                 | LowGrayLevelEmphasis                |
|          | wavelet-LH |                   | NGTDM             | Coarseness                           |                                     |
|          | Tumor      | Intensity         | logarithm         | Intensity                            | Maximum                             |
|          |            |                   | lbp-2D            | Intensity                            | MeanAbsoluteDeviation               |
|          |            |                   | exponential       | Intensity                            | RobustMeanAbsoluteDeviation         |
|          |            | Texture           | log-sigma-3-mm-3D | GLRLM                                | LongRunHighGrayLevelEmphasis**      |
|          |            |                   | logarithm         | NGTDM                                | Busyness                            |
|          |            |                   | log-sigma-1-mm-3D | NGTDM                                | Busyness                            |
|          |            |                   | gradient          | GLSZM                                | SmallAreaLowGrayLevelEmphasis       |
|          |            |                   | squareroot        | GLCM                                 | Contrast                            |
|          |            |                   | original          | GLRLM                                | RunVariance                         |
|          |            |                   | gradient          | GLCM                                 | Imc1                                |
|          |            |                   | squareroot        | NGTDM                                | Coarseness                          |
| ALK      |            |                   | Edema             | Intensity                            | log-sigma-3-mm-3D                   |
|          | squareroot | Intensity         |                   |                                      | Median*                             |
|          | logarithm  | Intensity         |                   |                                      | Uniformity                          |
|          | logarithm  | Intensity         |                   |                                      | Median                              |
|          | Texture    | logarithm         | GLRLM             | ShortRunEmphasis                     |                                     |
|          |            | wavelet-HL        | GLRLM             | RunEntropy                           |                                     |
|          |            | wavelet-HL        | GLRLM             | RunPercentage                        |                                     |
|          |            | log-sigma-1-mm-3D | GLDM              | LargeDependenceHighGrayLevelEmphasis |                                     |
|          |            | wavelet-HL        | GLRLM             | RunLengthNonUniformityNormalized     |                                     |

|           |                   |           |                                   |               |                                     |
|-----------|-------------------|-----------|-----------------------------------|---------------|-------------------------------------|
|           |                   |           | squareroot                        | NGTDM         | Coarseness                          |
|           |                   |           | wavelet-HH                        | GLSZM         | ZoneEntropy                         |
|           |                   |           | original                          | GLDM          | SmallDependenceEmphasis             |
|           |                   |           | log-sigma-2-mm-3D                 | GLRLM         | HighGrayLevelRunEmphasis            |
|           |                   |           | wavelet-LL                        | GLDM          | LargeDependenceLowGrayLevelEmphasis |
|           | Tumor             | Intensity | square                            | Intensity     | RootMeanSquared                     |
|           |                   | Texture   | log-sigma-2-mm-3D                 | GLDM          | LargeDependenceEmphasis             |
|           |                   |           | logarithm                         | GLCM          | JointEntropy                        |
|           |                   |           | square                            | NGTDM         | Contrast                            |
|           |                   |           | square                            | GLCM          | SumAverage                          |
| logarithm | GLCM              | Id        |                                   |               |                                     |
| KRAS      | Edema             | Intensity | wavelet-LH                        | Intensity     | RootMeanSquared                     |
|           |                   |           | logarithm                         | Intensity     | Median                              |
|           |                   |           | logarithm                         | Intensity     | Mean                                |
|           |                   |           | logarithm                         | Intensity     | 10Percentile                        |
|           |                   |           | logarithm                         | Intensity     | 90Percentile                        |
|           |                   | Texture   | wavelet-HL                        | GLRLM         | RunEntropy                          |
|           |                   |           | logarithm                         | GLCM          | SumEntropy                          |
|           |                   |           | wavelet-LH                        | GLSZM         | GrayLevelNonUniformityNormalized    |
|           |                   |           | log-sigma-1-mm-3D                 | GLSZM         | SmallAreaLowGrayLevelEmphasis       |
|           |                   |           | exponential                       | GLSZM         | SizeZoneNonUniformityNormalized     |
|           | Tumor             | Texture   | wavelet-HL                        | GLRLM         | RunPercentage                       |
|           |                   |           | square                            | GLSZM         | HighGrayLevelZoneEmphasis           |
|           |                   |           | exponential                       | GLSZM         | SmallAreaLowGrayLevelEmphasis       |
|           |                   |           | original                          | shape         | Flatness                            |
|           |                   |           | wavelet-LH                        | GLCM          | Imc2                                |
|           | exponential       |           | NGTDM                             | Strength      |                                     |
|           | log-sigma-1-mm-3D |           | GLRLM                             | RunPercentage |                                     |
|           | gradient          |           | NGTDM                             | Busyness      |                                     |
|           | log-sigma-1-mm-3D | GLDM      | DependenceNonUniformityNormalized |               |                                     |
|           | gradient          | NGTDM     | Contrast                          |               |                                     |

#Notes on filters: *log-sigma-n-mm-3D*—a Laplacian of Gaussian image, Gaussian kernel set to be  $n$  ( $=1, 2, 3$ ) mm, three-dimensional data was used. *wavelet-\**—2D wavelet transform was used, the image was decomposed into two axes. LH (low-high) means this filter focuses on y-axis variation, showing the horizontal details of the image. HH (high-high) means this filter focuses on both x-axis and y-axis variations, showing the diagonal details of the image. *lbp-2D*—local binary pattern (lbp) in 2D.

##Feature group abbreviations: *GLCM*, Gray Level Co-occurrence Matrix; *GLRLM*, Gray Level Run Length Matrix; *GLSZM*, Gray Level Size Zone Matrix; *NGTDM*, Neighboring Gray Tone Difference Matrix; *GLDM*, Gray Level Dependence Matrix.

\*The edema intensity feature shown in Fig. 4 and Table 4.

\*\*The tumor texture feature shown in Fig. 4 and Table 4.
